# Supplementary material for: Redefining Clinical Hyperprogression: the Incidence, Clinical Implications, and Risk Factors of Hyperprogression in Non-Small Cell Lung Cancer Treated with Immunotherapy
Source: bioRxiv or medRxiv preprint supplement (doi:10.1101/2024.01.04.23300116), 2024-01-05

Supplementary Figure 1.

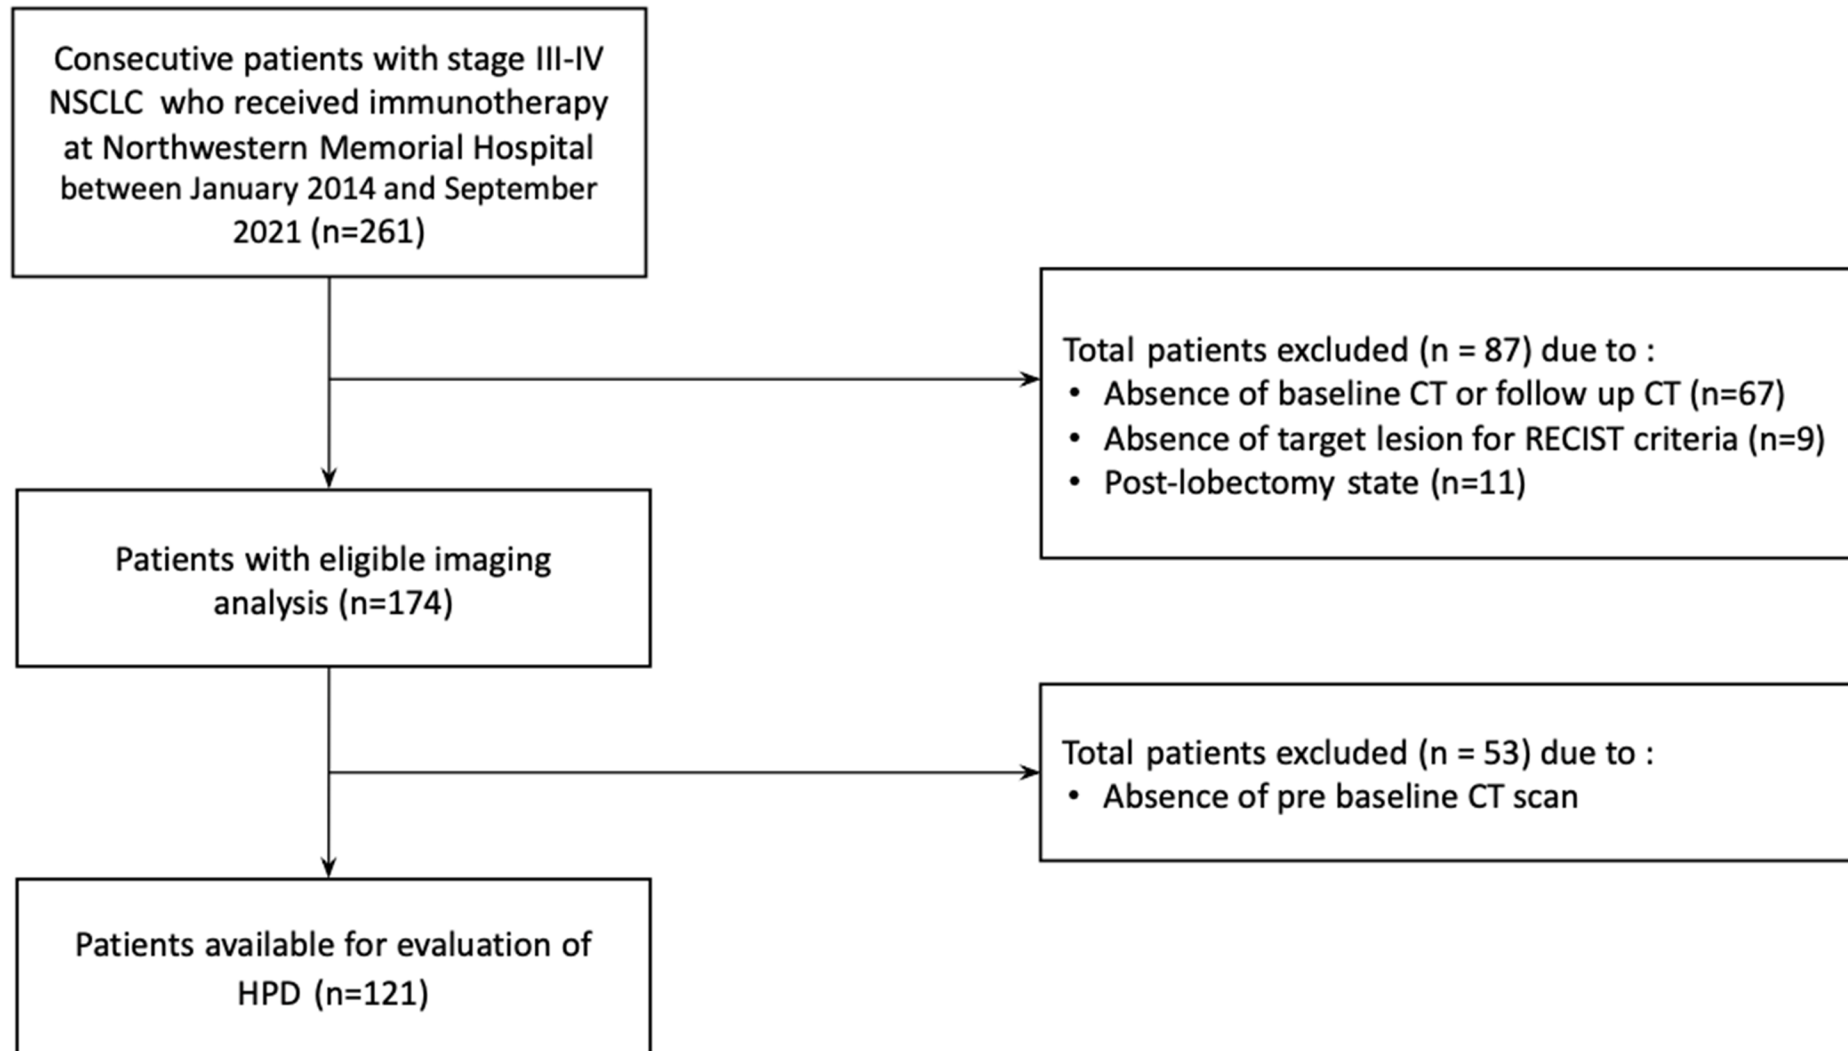

Supplementary Figure 2.

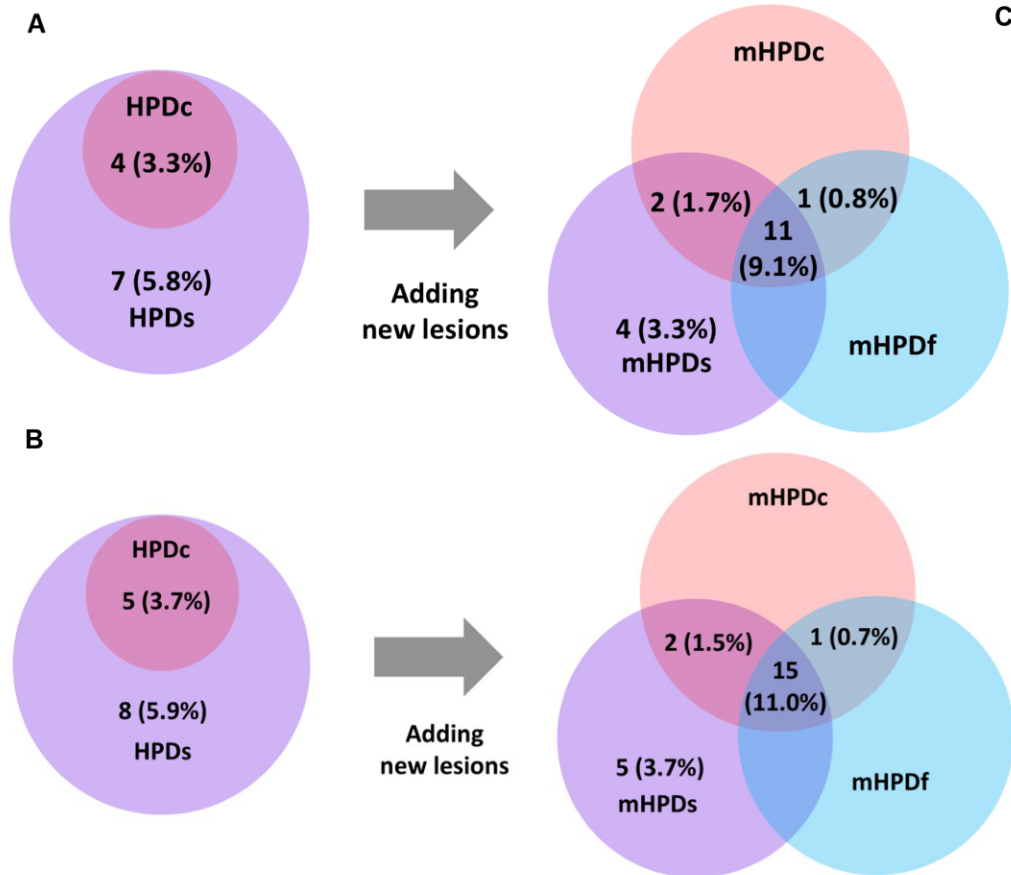

**C**

| Definitions of HPD | Using parameters                         | Cases of patient (n=121) | Cases of immunotherapy (n=136) |
|--------------------|------------------------------------------|--------------------------|--------------------------------|
| HPDc               | RECIST progression, TGR-exp/TGR-ref >2   | 4 (3.3)                  | 5 (2.9)                        |
| mHPDc              | HPDc + new lesions                       | 14 (11.6)                | 18 (13.2)                      |
| HPDs               | TGK-exp/TGK-ref >2                       | 11 (9.1)                 | 14 (10.3)                      |
| mHPDs              | HPDs + new lesions                       | 17 (14.0)                | 22 (16.2)                      |
| HPDf               | RECIST progression, TGR-exp/TGR-ref >50% | 0 (0.0)                  | 0 (0.0)                        |
| mHPDf              | HPDf + new lesions                       | 12 (9.9)                 | 16 (11.8)                      |

Supplementary Figure 3.

**A**

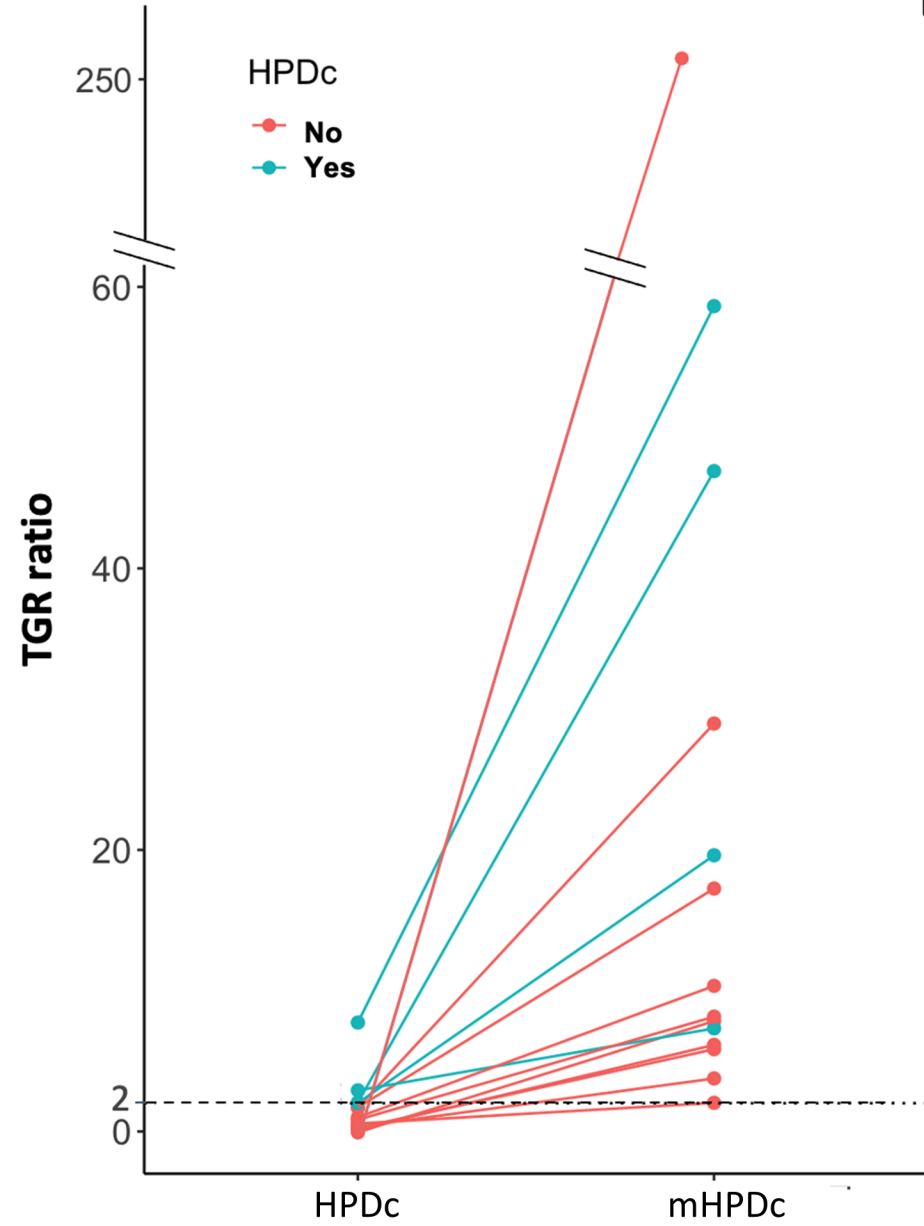

**B**

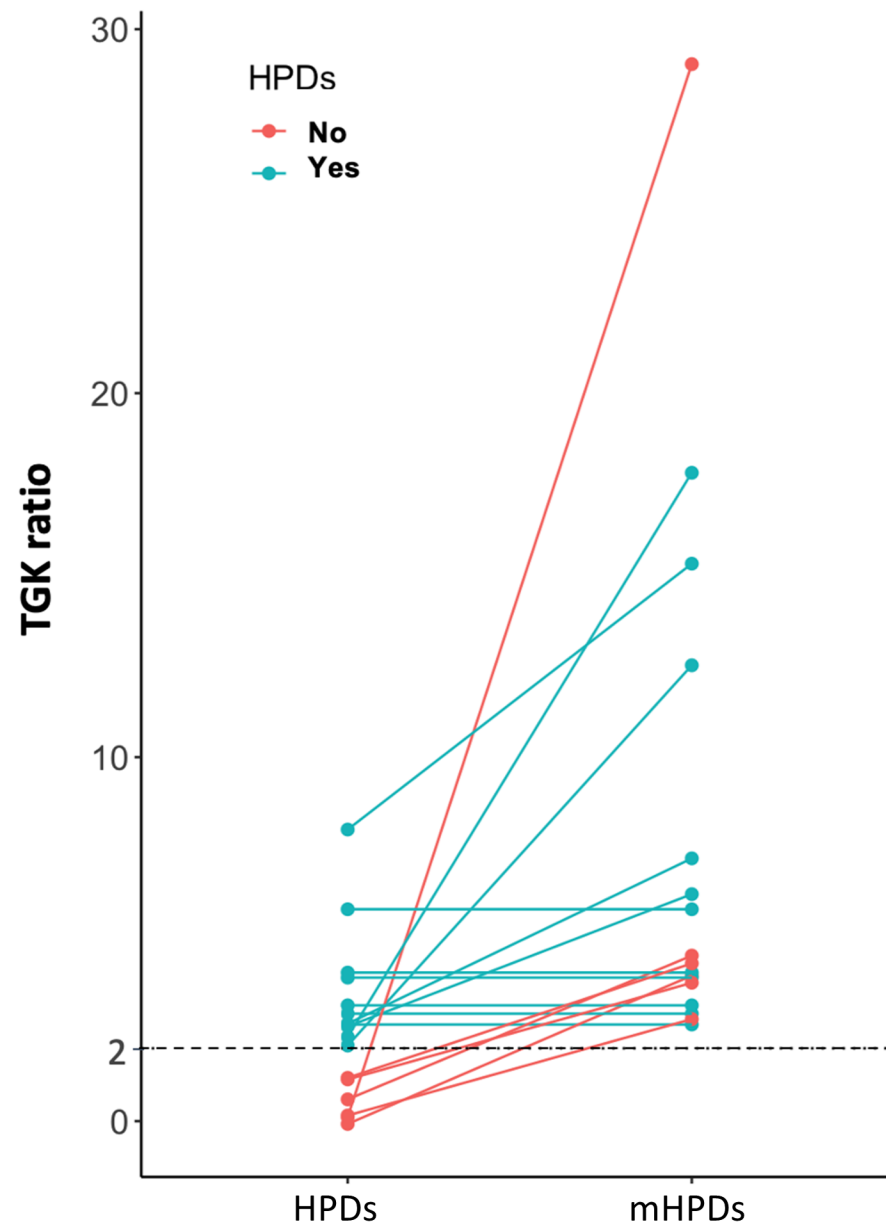

Supplementary Figure 4.

**A**

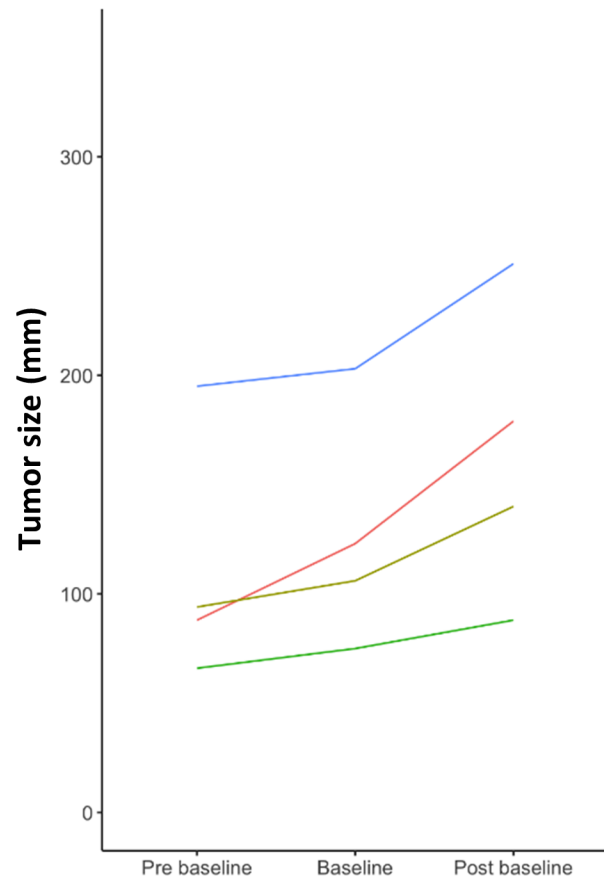

**HPDc**

**B**

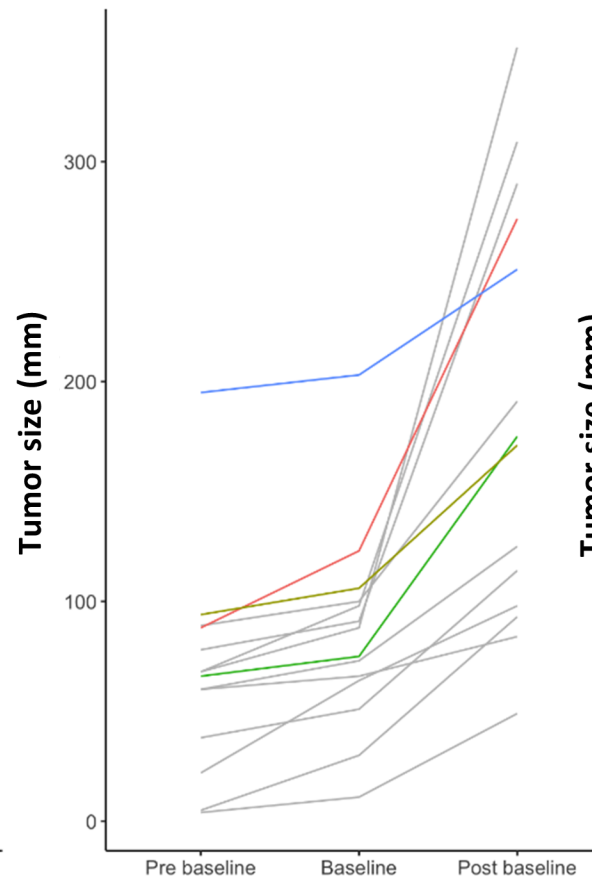

**mHPDc**

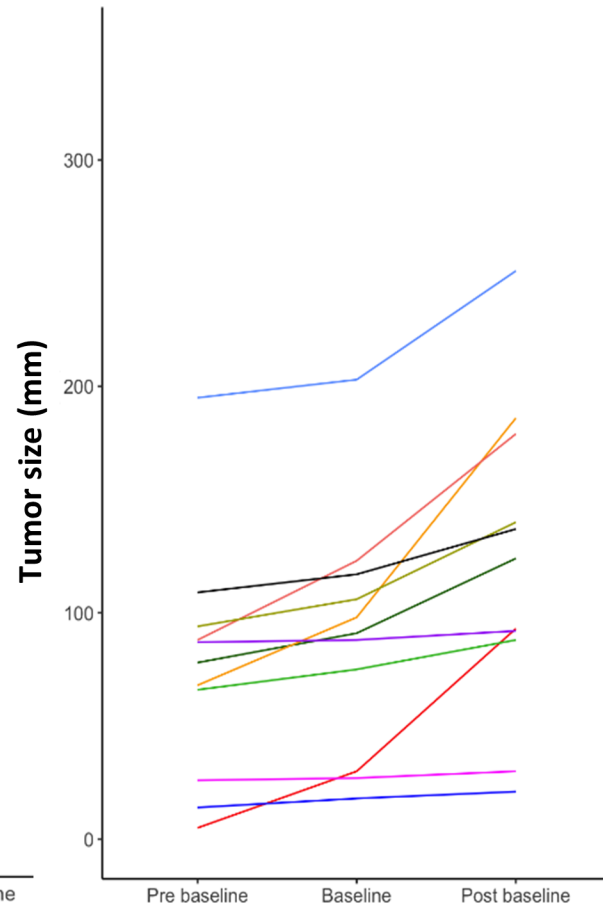

**HPDs**

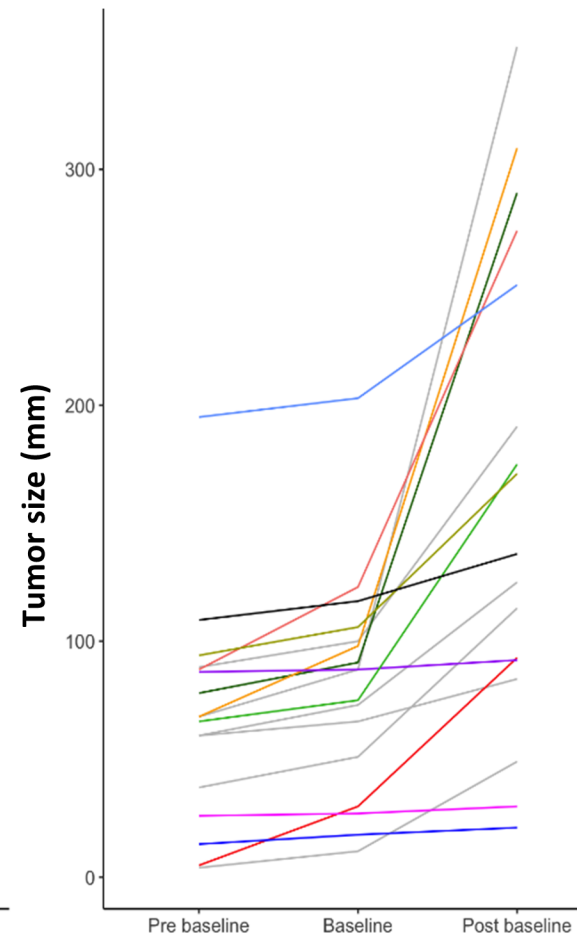

**mHPDs**

Supplementary Figure 5.

**A**

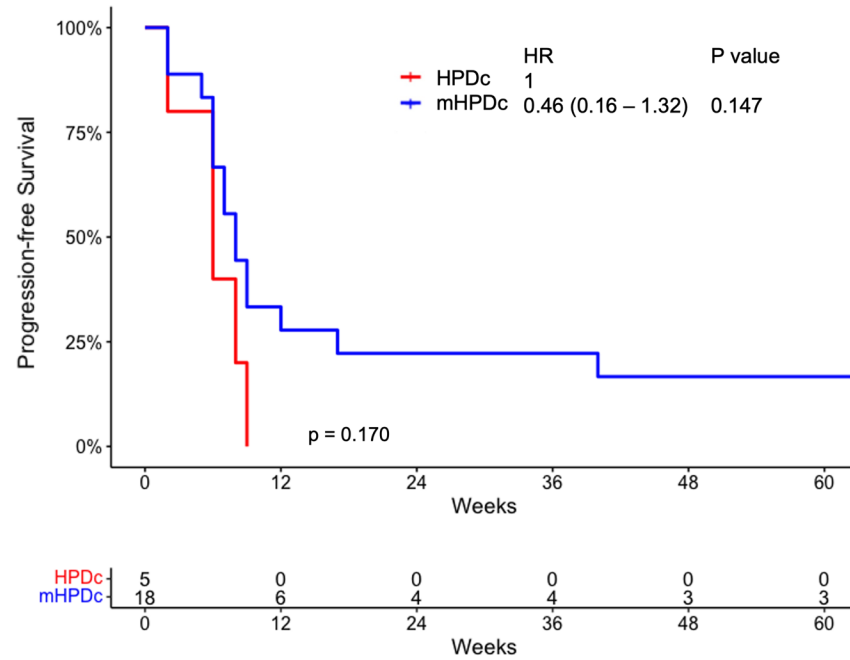

**B**

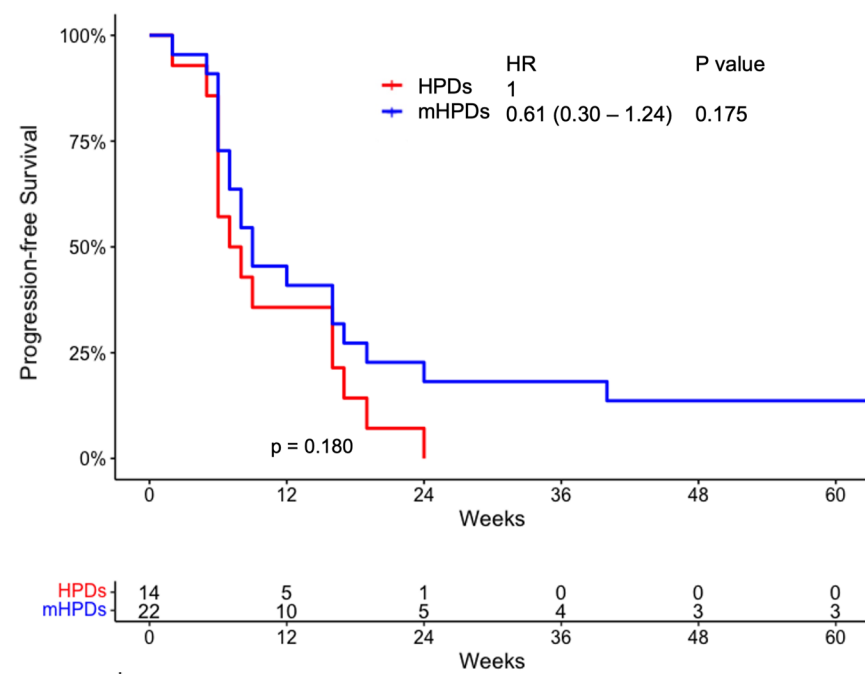

**C**

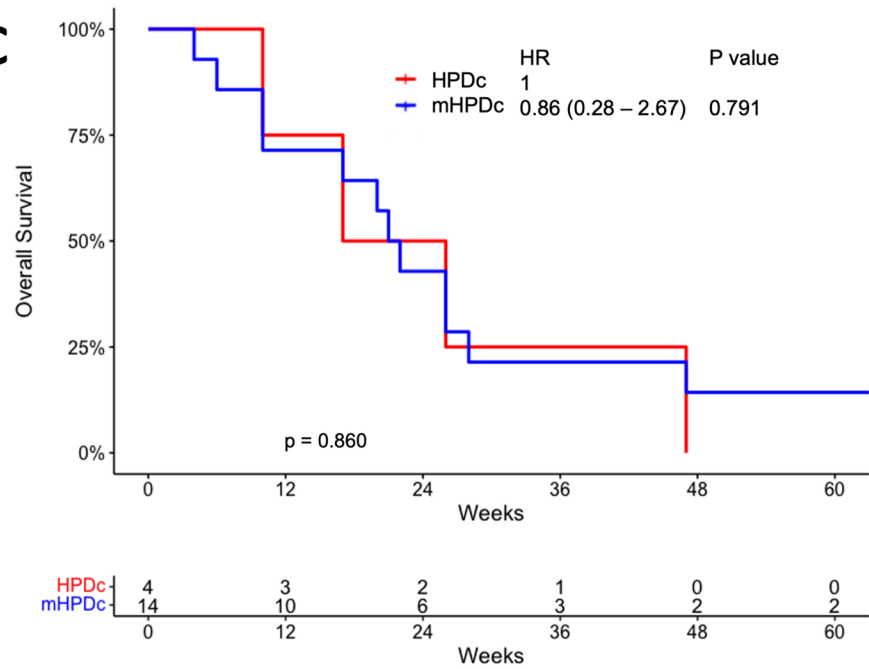

**D**

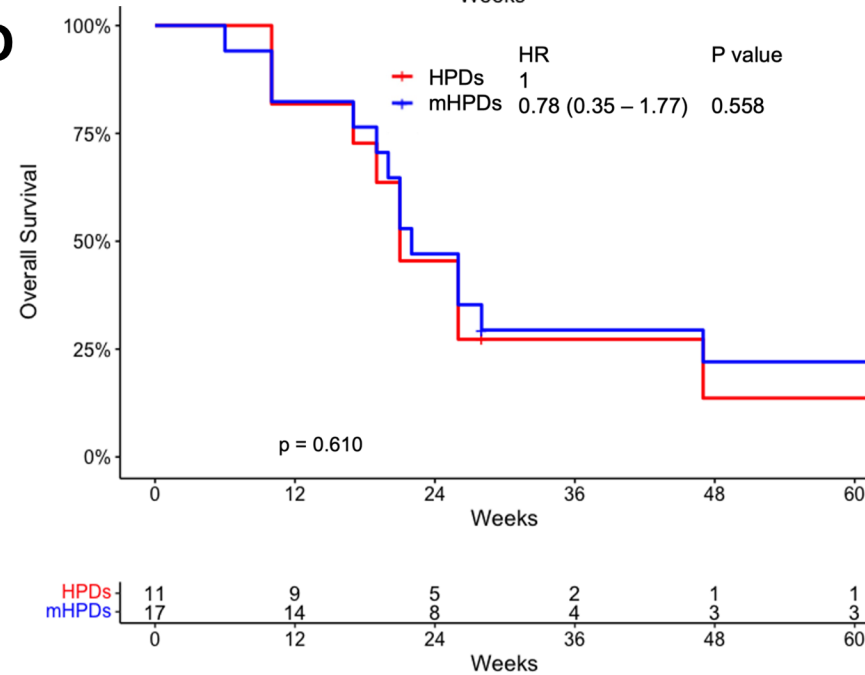

Supplement: Supplementary file [file media-1.pdf]
