# Supplementary material for: Redefining Clinical Hyperprogression: the Incidence, Clinical Implications, and Risk Factors of Hyperprogression in Non-Small Cell Lung Cancer Treated with Immunotherapy
Source: bioRxiv or medRxiv preprint supplement (doi:10.1101/2024.01.04.23300116), 2024-01-05
Supplement: Supplementary file [file media-2.pdf]

## Supplementary figures legend

Supplementary Figure 1. Flowchart of the patients selection process.

Supplementary Figure 2. Incidence of hyperprogressive disease (HPD) according to the original and modified definitions. (A) Incidences in 121 patients who received immunotherapy for non-small cell lung cancer. (B) Incidences in 136 cases in which immunotherapy was given for non-small cell lung cancer. (C) Changes in the incidence of HPD and modified HPD (mHPD) according to the three definitions of HPD.

HPDc, HPDs, and HPDf, HPD according to the definition proposed by *Champiat et al [8]*, *Saâda-Bouزيد et al [10]*, and *Ferrara et al [11]*.

Supplementary Figure 3. Changes of tumor growth rate (TGR) ratio (A) and tumor growth kinetics (TGK) ratio (B) using original definitions (HPDc, HPDs) and modified definitions (mHPDc, mHPDs).

HPDc, HPDs, and HPDf, HPD according to the definition proposed by *Champiat et al [8]*, *Saâda-Bouزيد et al [10]*, and *Ferrara et al [11]*.

Supplementary Figure 4. Changes of tumor burden, measured as the SLD of the target lesions for using original definitions (A, C) and modified definitions (B, D). For the original definition, the SLD of the target lesions was measured according to RECIST 1.1. For modified definition, all new measurable lesions on the post-treatment CT scan were incorporated in measuring the sum of longest diameters (SLD). Each number represents each patient. (A, B) Tumor burden at each time point (pre-baseline, baseline, and post-baseline) by using HPDc and mHPDc. (C, D) Tumor burden at each time point using HPDs and mHPDs.

HPDc, HPDs, and HPDf, HPD according to the definition proposed by *Champiat et al [8]*, *Saâda-Bouزيد et al [10]*, and *Ferrara et al [11]*.

Supplementary Figure 5. Comparison of progression-free survival (PFS) and overall survival (OS) in patients with hyperprogressive disease (HPD) and modified HPD (mHPD) after immunotherapy for non-small cell lung cancer. (A, C) PFS and OS were compared between patients with HPDc and mHPDc. (B ,D) PFS and OS were compared between patients with HPDs and mHPDs. HPDc and HPDs, HPD according to the definition proposed by *Champiat et al [8]* and *Saâda-Bouزيد et al [10]*.
